# Supplementary material
Source: publisher site journal article supplement (https://www.spandidos-publications.com/4289/downloadSupplementary)
Supplement: Supplementary file 2 [file downloadSupplementary]

## Sheet: Sheet1
Table SIII. FPKM values for all 60,498 gene transcripts
Sample	Total genes in genome	Expressed genes (FPKM>0) (%) a	Expressed genes (FPKM>=1) (%) b
siCtrl_1st	60.498	20,451 (33.80%)	10,946 (53.52%)
siCtrl_2nd	60.498	20,791 (34.37%)	10,651 (51.23%)
siCtrl_3rd	60.498	21,799 (36.03%)	10,900 (50.00%)
siDEK_1st	60.498	20,873 (34.50%)	10,921 (52.32%)
siDEK_2nd	60.498	20,919 (34.58%)	10,635 (50.84%)
siDEK_3rd	60.498	21,179 (35.01%)	10,789 (50.94%)
a Number of genes expressed as a proportion of the total number of genes in the total reference genome. bProportion of the number of genes whose expression level is greater than or equal to 1 to the number of genes whose expression level is greater than 0, meaning the proportion of the number of genes whose expression level is greater than 1 detected in this basic analysis to the number of genes …
